# Supplementary material for: The Oxysterol 25-Hydroxycholesterol Inhibits Replication of Murine Norovirus
Source: PubMed Central journal article supplement (PMC6409565; doi:10.3390/v11020097), 2019-01-24
Supplement: viruses-11-00097-s001.pdf [file viruses-11-00097-s001.pdf]

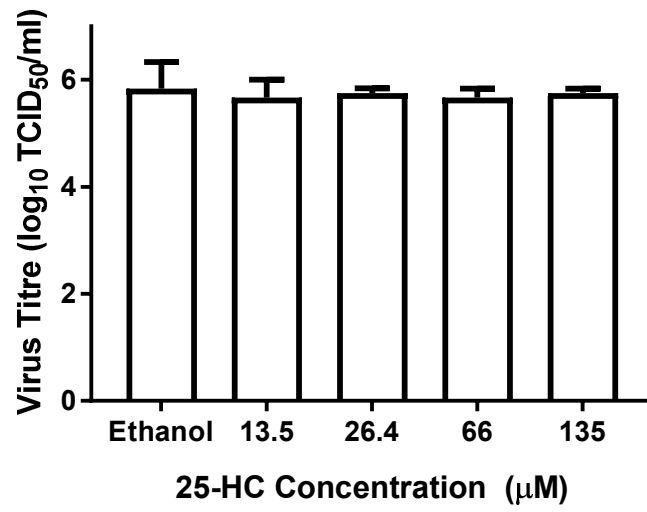

**Figure S1. The effect of 25-HC on the viral capsid.** Unpurified stocks of MNV were incubated with 25-HC at a range of concentrations or ethanol-only control at 4 h at 37 °C before dilution and measurement of infectivity by TCID<sub>50</sub> assay (n=2 ± SEM).
